# Supplementary material for: Malaria in Venezuela: changes in the complexity of infection reflects the increment in transmission intensity
Source: PubMed Central journal article supplement (PMC7206825; doi:10.1186/s12936-020-03247-z), 2020-05-07
Supplement: 12936_2020_3247_MOESM2_ESM.pdf [file 12936_2020_3247_MOESM2_ESM.pdf]

**Additional file 2: Table S2. (A) *Plasmodium falciparum* data and (B) *P. vivax*:** One-sided bootstrap test for differences in MOI. The test statistic (difference in estimated  $\lambda$ ), and p-value of bootstrap test based on B=10,000 bootstrap repeats using bias correction and acceleration are shown. The lower and upper bounds of the 95% bias-corrected and accelerated (BCa) bootstrap condensed interval of the test statistic based on B=10,000 bootstrap repeats are also shown. All markers showed an increase in MOI.

| (A)           | test stat | p-val  | low    | up     |
|---------------|-----------|--------|--------|--------|
| Poly $\alpha$ | 0.1786    | 0.0000 | 0.0604 | 0.5647 |
| TAA81         | 0.2414    | 0.0000 | 0.1394 | 0.7641 |
| TAA42         | 1.1177    | 0.0000 | 0.0000 | 2.5030 |
| TAA109        | 0.4676    | 0.0000 | 0.1666 | 1.7883 |
| ARA2          | 0.8051    | 0.0000 | 0.5374 | 1.4233 |
| Pfg377        | 0.1631    | 0.0000 | 0.0616 | 0.0000 |
| PfPK2         | 0.3213    | 0.0000 | 0.1772 | 0.9261 |
| TAA60         | 0.4334    | 0.0000 | 0.2412 | 1.3629 |

| (B)    | test stat | p-val  | low    | up     |
|--------|-----------|--------|--------|--------|
| MS2    | 1.3124    | 0.0000 | 1.0414 | 1.9730 |
| MS5    | 1.3842    | 0.0000 | 1.0945 | 2.0253 |
| MS6    | 1.3914    | 0.0000 | 1.0730 | 1.8571 |
| MS15   | 1.2938    | 0.0000 | 1.0076 | 1.7916 |
| 14.185 | 0.9236    | 0.0000 | 0.6839 | 1.3923 |
| 2.21   | 1.5549    | 0.0000 | 1.2356 | 1.9796 |
| MS8    | 1.5297    | 0.0000 | 1.1935 | 2.0754 |
| MS1    | 1.0688    | 0.0000 | 0.8358 | 1.6602 |
| MS10   | 2.0073    | 0.0000 | 1.4941 | 2.5542 |
