# Supplementary material for: Malaria in Venezuela: changes in the complexity of infection reflects the increment in transmission intensity
Source: PubMed Central journal article supplement (PMC7206825; doi:10.1186/s12936-020-03247-z), 2020-05-07
Supplement: 12936_2020_3247_MOESM3_ESM.pdf [file 12936_2020_3247_MOESM3_ESM.pdf]

**Additional file 3: Table S3. (A) *Plasmodium falciparum* and (B) *P. vivax* data:** Two-sided bootstrap test for differences in heterozygosity per marker. The test statistic (difference in heterozygosity), and p-value of bootstrap test based on B=10,000 bootstrap repeats using bias correction and acceleration are shown. The lower and upper bounds of the 95% bias-corrected and accelerated (BCa) bootstrap condensed interval of the test statistic based on B= 10,000 bootstrap repeats, as well as the p-value for a permutation test to compare the underlying frequency distributions using the differences in heterozygosity as test statistic, are also shown. The permutation test was approximated using 10,000 permutations. Note, that the permutation test will have relatively low power because of the employed test statistic. Namely, different frequency distributions can have similar heterozygosity values. Only some markers show a difference in MOI.

**(A)**

|               | test stat | p-val  | low     | up      | p-val perm |
|---------------|-----------|--------|---------|---------|------------|
| Poly $\alpha$ | -0.2284   | 0.0000 | -0.3376 | -0.0818 | 0.0000     |
| TAA81         | -0.4057   | 0.0250 | -0.4828 | -0.2388 | 0.0000     |
| TAA42         | 0.5332    | 0.0000 | 0.4783  | 0.6011  | 0.0000     |
| TAA109        | 0.3625    | 0.0000 | 0.2662  | 0.5663  | 0.0000     |
| ARA2          | -0.3928   | 0.0995 | -0.4450 | -0.2185 | 0.0000     |
| Pfg377        | -0.1709   | 0.0192 | -0.2644 | -0.0412 | 0.0000     |
| PfPK2         | 0.1257    | 0.0001 | 0.0606  | 0.2163  | 0.0012     |
| TAA60         | 0.0115    | 0.8476 | -0.0844 | 0.1440  | 0.7814     |

**(B)**

|        | test stat | p-val  | low     | up      | p-val perm |
|--------|-----------|--------|---------|---------|------------|
| MS2    | -0.0412   | 0.1437 | -0.1190 | 0.0134  | 0.0000     |
| MS5    | -0.2637   | 0.0000 | -0.3580 | -0.1769 | 0.0000     |
| MS6    | 0.0270    | 0.3944 | -0.0407 | 0.0876  | 0.0361     |
| MS15   | 0.0002    | 0.9830 | -0.0773 | 0.0589  | 0.9916     |
| 14.185 | -0.1097   | 0.0600 | -0.2231 | 0.0034  | 0.0128     |
| 2.21   | 0.0543    | 0.0973 | -0.0090 | 0.1440  | 0.0030     |
| MS8    | -0.0595   | 0.0317 | -0.1118 | -0.0043 | 0.0000     |
| MS1    | -0.1251   | 0.0008 | -0.1977 | -0.0557 | 0.0000     |
| MS10   | 0.0511    | 0.2437 | -0.0315 | 0.1724  | 0.0878     |
