# Supplementary material for: Malaria in Venezuela: changes in the complexity of infection reflects the increment in transmission intensity
Source: PubMed Central journal article supplement (PMC7206825; doi:10.1186/s12936-020-03247-z), 2020-05-07

**Additional file 5: Figure S1B.** *Plasmodium vivax* data: Frequency distribution of alleles per locus and year sampled (2003/2004 and 2018).

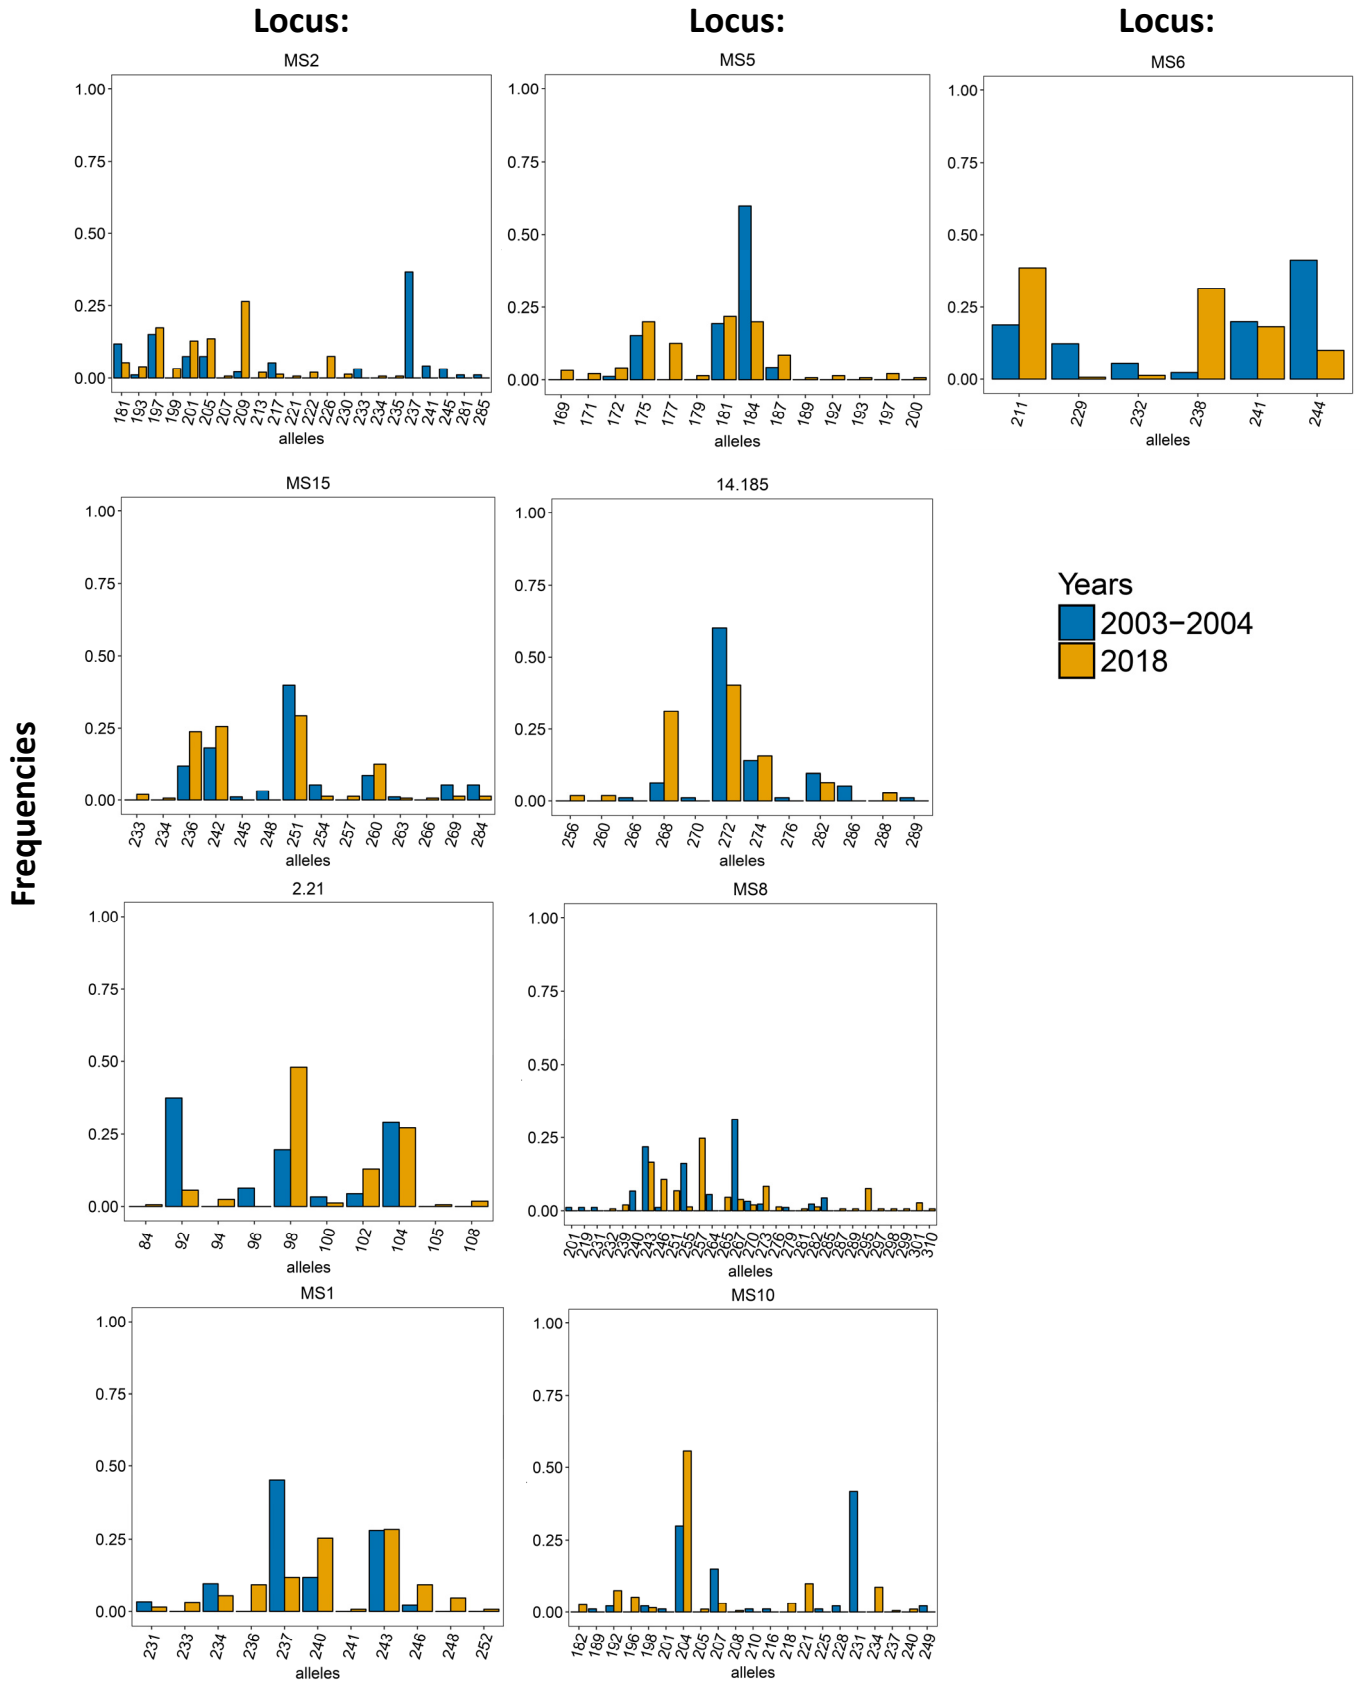

Supplement: 12936_2020_3247_MOESM5_ESM.pdf [file 12936_2020_3247_MOESM5_ESM.pdf]
