# Supplementary material for: Malaria in Venezuela: changes in the complexity of infection reflects the increment in transmission intensity
Source: PubMed Central journal article supplement (PMC7206825; doi:10.1186/s12936-020-03247-z), 2020-05-07
Supplement: 12936_2020_3247_MOESM6_ESM.pdf [file 12936_2020_3247_MOESM6_ESM.pdf]

**Additional file 6: Table S4. (A) *Plasmodium falciparum* and (B) *P. vivax* data:** cumulated explained variance by PCAs. In Pf, about 64% of the variance is explained by the first 4 components and in Pv, about 35% of the variance is explained by the first 4 components.

| (A) | PCA | cum variance in % |
|-----|-----|-------------------|
|     | 1   | 0.2570            |
|     | 2   | 0.4228            |
|     | 3   | 0.5520            |
|     | 4   | 0.6421            |

| (B) | PCA | cum variance in % |
|-----|-----|-------------------|
|     | 1   | 0.1645            |
|     | 2   | 0.2377            |
|     | 3   | 0.3008            |
|     | 4   | 0.3454            |
